# Supplementary material for: Neuronal DAMPs exacerbate neurodegeneration via astrocytic RIPK3 signaling
Source: PubMed Central journal article supplement (PMC11382884; doi:10.1172/jci.insight.177002), 2024-05-07

# Figure 6E

| 1      | 2                  | 3                         | 4                  | 5                         | 6             | 7                    | 8             | 9                    |
|--------|--------------------|---------------------------|--------------------|---------------------------|---------------|----------------------|---------------|----------------------|
| Ladder | Saline<br>NCM<br>1 | Saline<br>NCM<br>1<br>DSS | Saline<br>NCM<br>2 | Saline<br>NCM<br>2<br>DSS | NCM<br>MPP+ 1 | NCM<br>MPP+ 1<br>DSS | NCM<br>MPP+ 2 | NCM<br>MPP+ 2<br>DSS |

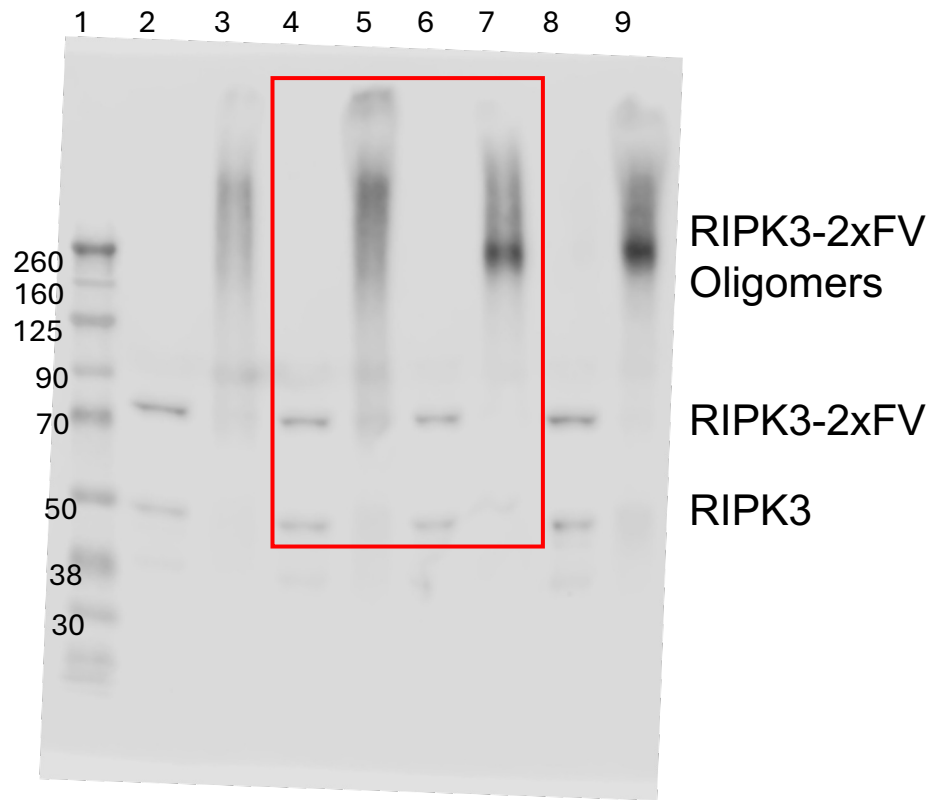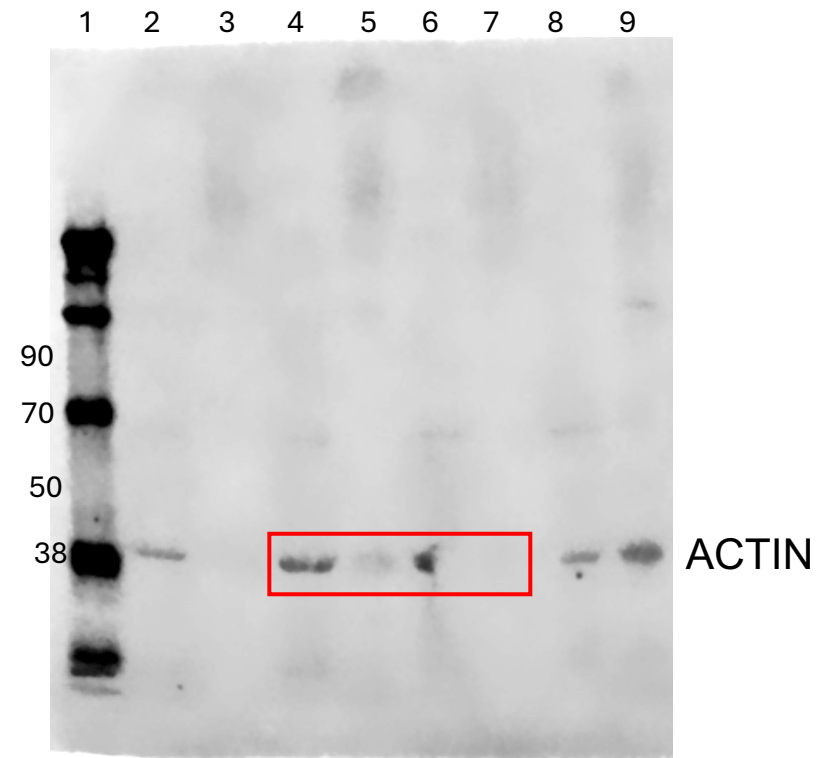

# Figure 6F

| 1      | 2                        | 3                              | 4                         | 5                        | 6                              | 7                         | 8                     | 9                           | 10                     | 11                    | 12                          | 13                     |
|--------|--------------------------|--------------------------------|---------------------------|--------------------------|--------------------------------|---------------------------|-----------------------|-----------------------------|------------------------|-----------------------|-----------------------------|------------------------|
| Ladder | Saline<br>NCM 1<br>Input | Saline<br>NCM 1<br>Flowthrough | Saline<br>NCM 1<br>Eluate | Saline<br>NCM 2<br>Input | Saline<br>NCM 2<br>Flowthrough | Saline<br>NCM 2<br>Eluate | NCM<br>MPP+1<br>Input | NCM<br>MPP+1<br>Flowthrough | NCM<br>MPP+1<br>Eluate | NCM<br>MPP+2<br>Input | NCM<br>MPP+2<br>Flowthrough | NCM<br>MPP+2<br>Eluate |

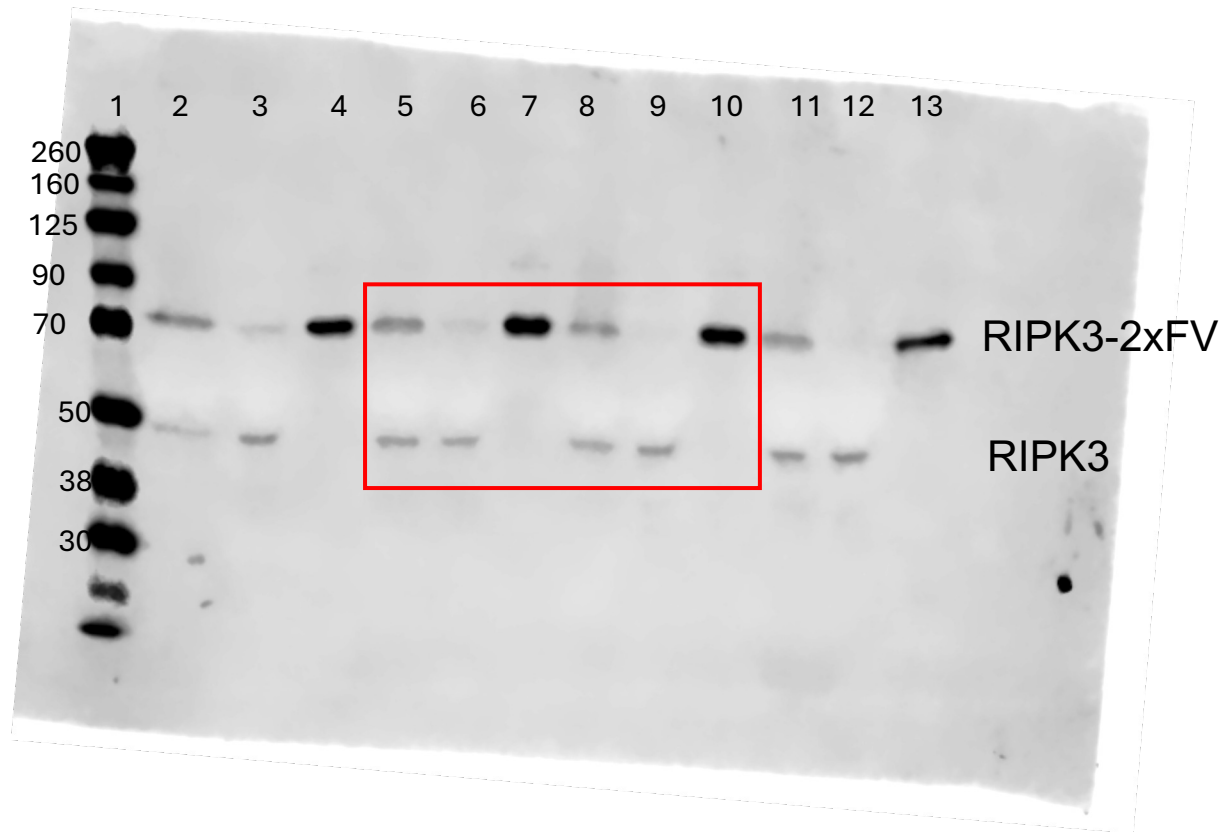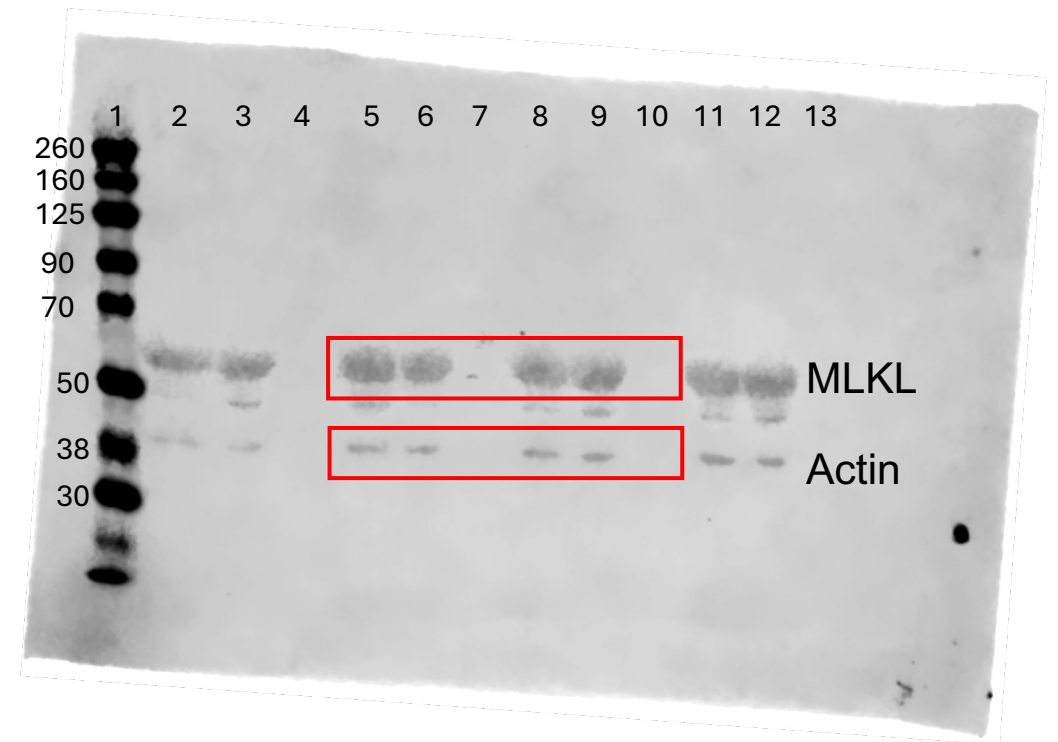

Supplement: jciinsight-9-177002-s085.pdf [file jciinsight-9-177002-s085.pdf]
